# Supplementary material
Source: PubMed Central journal article supplement (PMC2528093)
Supplement: pp.108.117663_1.pdf [file pp.108.117663_1.pdf]

```

1 -----MPVVTRLIRLKCGLRLDRSGLNRRICHGGHGESTRRRVRMEELSSLTVSQREQFLVENDVFCIYNFFDASDVSTQKYMM
At ERA1
1 -----MEELSLTVSQREQFLVENDVFCIYNFFDASDVSTQKYMM
At MOS8
1 -----MESRKYFKLLEDQWVERREYDVPYSISPNSPSDLI
Le_FTaseB
1 -----MESVMKGTCTEDOMLNHKVYIYSQESHSLPPNAQAAYL
Cr_FTaseB
1 -----SASALPRLTQVOMKVEAKVGEIYRVLFGNAPNANSLML
Os_FTaseB
1 -----MEASTAAETPTPTVSRQDQNIQVESQVFIYQLFANIPP-----
Ps_FTaseB

81 IQDKQLDYLKMKGLRQLGPOFSSLDANRPWLCYWLHSHIALLGTEVDDLELESNALDFLRCQSGSEGGYGGPGQLPHLATTYAAVNAALVTLGGD
At ERA1
42 IQDKQLDYLKMKGLRQLGPOFSSLDANRPWLCYWLHSHIALLGTEVDDKLESNALDFLRCQSGSEGGYGGPGQLPHLATTYAAVNAALVTLGGD
At MOS8
43 IERDKHPGLYSLQGLRKLGPSFVLDASDANRPWLCYWLHSHIALLGESIGGKLENDALDFLRCQDKDGGYGGPGQLPHLATTYAAVNSLITLGGP
Le_FTaseB
96 LREQHVEYLTRGLKHLGPSFHVLDANRPWLCYWIHALALL-DEIPDDVEDDIDVFLSRCQDKDGGYGGPGQLPHLATTYAAVNTLVTLGSE
Os_FTaseB
39 -----NAQSIIRPWLWCYWIHSHIALLGESIDDDLEDNTVDFLNRCDQPNGGYAGGPGQMPHLATTYAAVNTLITLGGE
Ps_FTaseB

176 ALSSINREKMSCFLRMRKMTSGGFRMHDMGEMDVRACYTAISVASILNIMDDELTOGLGDYLLSCQTYEGGIGGEPGSEAHGGYTCGLAAMIL
At ERA1
137 ALSSINREKMSCFLMRKMTSGGFRMHDMGEMDVRACYTAISVASILNIMDDELTOGLGDYLLSCQTYEGGIGGEPGSEAHGGYTCGLAAMIL
At MOS8
138 ALSSINREKLYTFLMRKMDASGGFRMHGGEDVDRACYTAISVANILNIVDDELIHGVNYYLLSCQTYEGGIGAGEPSEAHGGYTCGLAAMIL
Le_FTaseB
139 SLSSIDREKLYSFLMRKMDASGGFRMHGGELDVRACYTAISVASVNLNIDDKLVKNI GDYISSCQTYEGGIGAGEPSEAHGGYTCGLAAMIL
Cr_FTaseB
190 ALSSINREKLYKFLMRKMDTSGFRMHGGEDVDRASYTAISVASLVNILDGELAKVGNYYITRCQTYEGGIGAGEPSEAHGGYTCGLAAMIL
Os_FTaseB
113 SLASINRNKLYGEMRMRKQPNGGFRMHDEGIDVRACYTAISVASVNLNILDDELKKNVGDFFLLSCQTYEGGIGAGEPSEAHGGYTCGLAAMIL
Ps_FTaseB

271 NEVDRINLDSLMNWAHVRQGVEMFGQGRTNKLVDCGYTFWQAAAPCVLLQRLVSTNDHDVHGSSH-----ISECTNEEHHHEDDLEDDSDDDDDDS
At ERA1
232 NEVDRINLDSLMNWAHVRQGVEMFGQGRTNKLVDCGYTFWQAAAPCVLLQRLVSTNDHDVHGSSH-----ISECTNEEHHHEDDLEDDSDDDDDDS
At MOS8
233 NEVNRDLPLGLDWWVFRQGVEMFGQGRTNKLVDCGYTFWQAAAVFLQRLNLIHVEOLGSLND-----LSTESADDSSELDEEHLEGIS
Le_FTaseB
234 DEVERLDLPLGLDWWVFRQGVEMFGQGRTNKLVDCGYTFWQAAAVMIQKLDVLAQQLGVPNAGDWGYYSEDDHSAASDQSDVQEPFAERTSE
Cr_FTaseB
285 NEVDRDLASLIGWVAFRQGVEMFGQGRTNKLVDCGYTFWQAAALALQKLMIVVDEQLKSS--YSSKRPPGDDACGTSSTEAAYYAKFG--
Os_FTaseB
208 GEVNRDLPLGLDWWVFRQGVEMFGQGRTNKLVDCGYTFWQAAVALLQRLHSIIDEQMAEASQFVTVSDAPEKELCLDGTSSHATSHIRHEGM
Ps_FTaseB

362 EDNDEDSVNGHRHHTSTYINRRMQLVFDLSLGLQRYVLLCSKI PDGGFRDKPKRPRDFHTCYCLSGLSVAQHAWLKDDEDT
At ERA1
323 EDNDEDSVNGHRHHTSTYINRRMQLVFDLSLGLQRYVLLCSKI PDGGFRDKPKRPRDFHTCYCLSGLSVAQHAWLKDDEDT
At MOS8
322 VQDTPLGQAGACQEMASHPKIADTGYEFINRPIAMRPLFDSMYLQQYVLLCSQIEVGGFRDKPKGRDYYHTCYCLSGLSLAQYSWTDDEAD
Le_FTaseB
328 NGVACNLNQR--EDNDSPSANLTDAGYNFISKRTAIGSLFNSMLLQQYIILLCSSQEEQG-FRDKPKGRDYYHTCYCLSGLSI QYCSVMDLN-S
Cr_FTaseB
374 -----EDFIEKSNQIGLPHFNIALQQYIILLCQVLDGGLRDKPKGRDYYHTCYCLSGLSI QYCSVMDLN-S
Os_FTaseB
303 -----ESCSQSDVKNIGYNFISEWRQSEPLFHSIALQQYIILLCSSQEEQDGGGLRDKPKGRDYYHTCYCLSGLSI QYCSVMDLN-S
Ps_FTaseB

444 PLFRDIMGYSN-LLLEPVQLLHNIVMDQYNEAIEFFFKAA-----
At ERA1
405 PLFRDIMGYSN-LLLEPVQLLHNIVMDQYNEAIEFFFKAA-----
At MOS8
417 PLFRDVFQYYSKCLLEQVHPLFNVDRIYAREYSQACETVSPLSLAPTFSET
Le_FTaseB
418 PECRDVFGPYTN-LLLEQVHPLVIGIVLDRYNEARDFFSKS-----
Cr_FTaseB
442 PLFQHVLDGYSN-LLLEPIHPLVNVLDKRYHTAYEFPFS-----
Os_FTaseB
382 PLFQVVMGYSN-LLLEPIHPLVNVLDKRYREAREHEFFFSQL-----
Ps_FTaseB

```
