# Supplementary material
Source: PubMed Central journal article supplement (PMC2528093)
Supplement: pp.108.117663_2.pdf [file pp.108.117663_2.pdf]

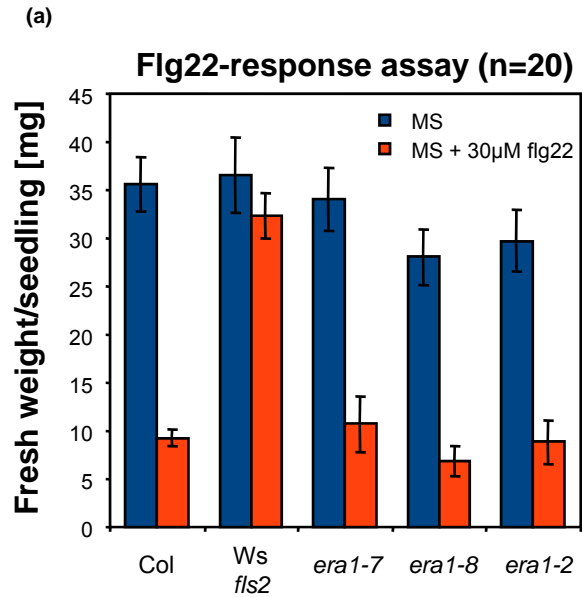

(b)

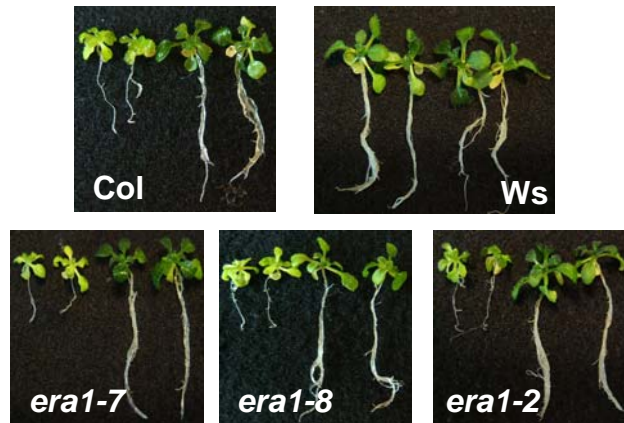

**Supplementary Figure 2: Response of *era1* alleles to flg22.**

Following procedures described in Gomez-Gomez *et al.*, 1999, seedlings grown for ten days on MS agar plates were transferred to liquid MS or liquid MS supplemented with 30 µM flg22. The fresh weight of 20 plants from each treatment was analyzed 10 days later by weighing. Error bars represent standard deviation, and the experiment was repeated once with similar results. (a) Data presented as bar format. (b) Pictures of representing seedlings. In each panel, the left two plants are the ones soaked in MS supplemented with flg22, while the right two seedlings are the control plants soaked in MS alone.
