# Supplementary material
Source: PubMed Central journal article supplement (PMC2528093)
Supplement: pp.108.117663_3.pdf [file pp.108.117663_3.pdf]

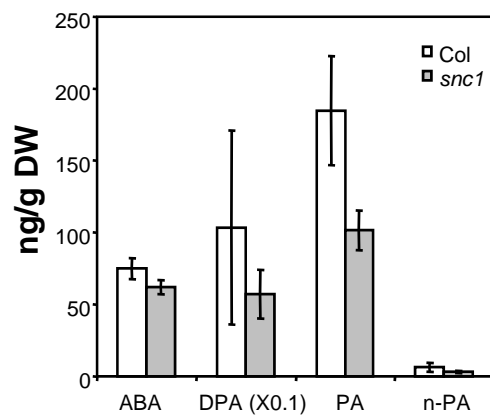

**Supplementary Figure 3: Levels of ABA and its metabolites in leaves of Col and *snc1*.**

DPA X 0.1, dihydrophaseic acid; PA phaseic acid; n-PA neophaseic acid. n=3. The experiment was repeated once with similar results.
