# Supplementary material
Source: PubMed Central journal article supplement (PMC2528093)
Supplement: pp.108.117663_4.pdf [file pp.108.117663_4.pdf]

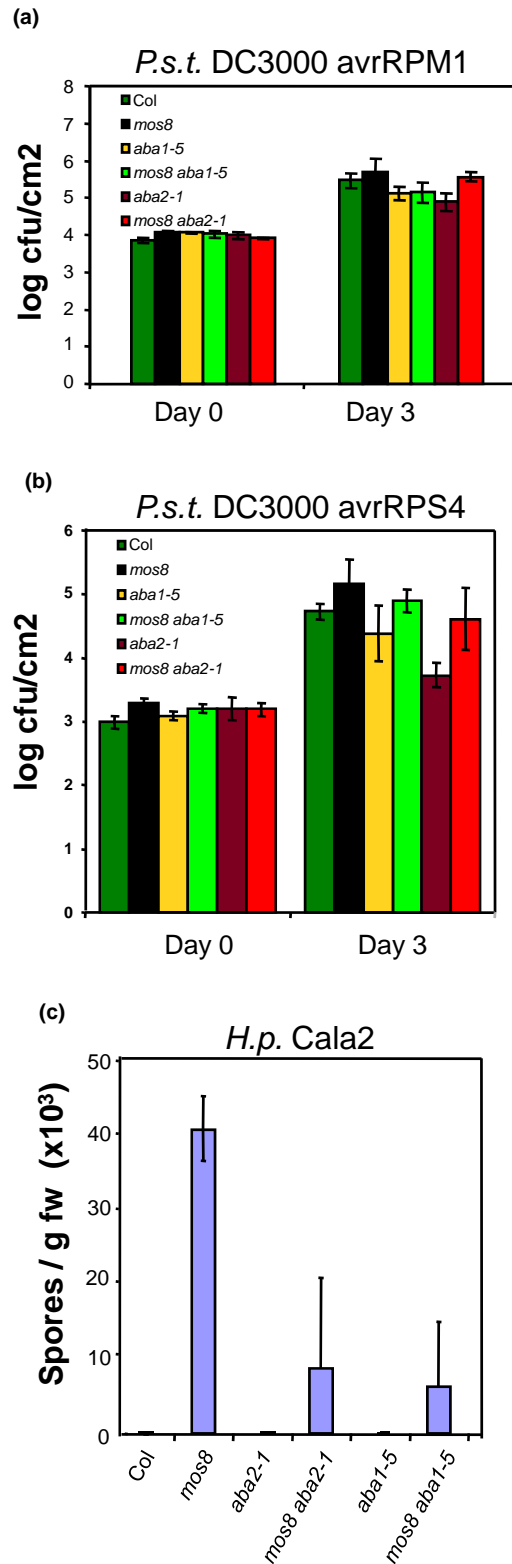

**Supplementary Figure 4: Contribution of ABA in *era1*-mediated enhanced pathogen susceptibility**

(a) Plants were infected with avirulent *P.s.t.* DC3000 carrying *AvrRPM1*.

(b) Plants were infected with avirulent *P.s.t.* DC3000 carrying *AvrRPS4*.

(d) Plants were infected with avirulent *H.p.* Cala2 carrying *AvrRPP2*.

Bacterial growth was determined as colony forming units dpi. Experiments were repeated at least once with similar results. Bars represent the average of six biological replicates, error bars indicate standard deviation.
