# Supplementary material
Source: PubMed Central journal article supplement (PMC2528093)
Supplement: pp.108.117663_5.pdf [file pp.108.117663_5.pdf]

## SUPPLEMENTAL FIGURE LEGENDS AND TABLES I-III

### **Supplementary Figure 1: Alignment of Farnesyltransferases from different plant species.**

Amino acid sequences were aligned using clustalW (<http://www.ebi.ac.uk/clustalw/>) and shaded using boxshade ([http://www.ch.embnet.org/software/BOX\\_form.html](http://www.ch.embnet.org/software/BOX_form.html)). Conserved residues are shaded in black and similar residues are shaded in grey. The newly predicted start codon is indicated with a red \*. At\_ERA1 *Arabidopsis thaliana* (accession NP\_198844); Le\_FTaseB *Lycopersicon esculentum* (tomato, accession AB69757); Cr\_FTase B: *Catharanthus roseus* (Madagascar periwinkle, accession AAQ02809); Os\_FTaseB *Oryza sativa* japonica cultivar-group (rice, accession NP\_001044183); Ps\_FTaseB: *Pisum sativum* (pea, accession Q04903).

### **Supplementary Figure 2: Response of *era1* alleles to flg22.**

Following procedures described in Gomez-Gomez *et al.*, 1999, seedlings grown for ten days on MS agar plates were transferred to liquid MS or liquid MS supplemented with 30  $\mu$ M flg22. The fresh weight of 20 plants from each treatment was analyzed 10 days later by weighing. Error bars represent standard deviation, and the experiment was repeated once with similar results. (a) Data presented as bar format. (b) Pictures of representing seedlings. In each panel, the left two plants are the ones soaked in MS supplemented with flg22, while the right two seedlings are the control plants soaked in MS alone.

### **Supplementary Figure 3: Levels of ABA and its metabolites in leaves of Col and *snc1*.**

DPA X 0.1, dihydrophaseic acid; PA phaseic acid; n-PA neophaseic acid. n=3. The experiment was repeated once with similar results.

### **Supplementary Figure 4: Contribution of ABA in *era1*-mediated enhanced pathogen susceptibility.**

(a) Plants were infected with avirulent *P.s.t.* DC3000 carrying *AvrRPM1*.

(b) Plants were infected with avirulent *P.s.t.* DC3000 carrying *AvrRPS4*.

(d) Plants were infected with avirulent *H.p.* Cala2 carrying *AvrRPP2*.

Bacterial growth was determined as colony forming units dpi. Experiments were repeated at least once with similar results. Bars represent the average of six biological replicates, error bars indicate standard deviation.

**Supplemental Table 1: Allelism test between several *era1*-alleles and *mos8 snc1 npr1-1*.**

| cross <sup>1)</sup>                     | F <sub>1</sub><br>morphology <sup>2)</sup> | F <sub>2</sub><br>phenotypic segregation <sup>3)</sup> |         |                   |                   |
|-----------------------------------------|--------------------------------------------|--------------------------------------------------------|---------|-------------------|-------------------|
|                                         |                                            | total                                                  | wt-like | <i>snc1</i> -like | <i>era1</i> -like |
| <i>era1-8</i> X <i>mos8 snc1 npr1-1</i> | <i>era1</i> -like                          | 197                                                    | 0       | 0                 | 197               |
| <i>mos8 snc1 npr1-1</i> X <i>era1-5</i> | <i>era1</i> -like                          | 150                                                    | 0       | 0                 | 150               |
| <i>mos8 snc1 npr1-1</i> X <i>era1-6</i> | <i>era1</i> -like                          | 125                                                    | 0       | 0                 | 125               |
| <i>era1-2</i> X <i>era1-7</i>           | <i>era1</i> -like                          | 205                                                    | 0       | 0                 | 205               |

<sup>1)</sup> The crosses are indicated with the female parent first, the male parent second. *era1-4,5,6* are in Ler ecotype, *era1-2,8* are in Col ecotype.

<sup>2)</sup> F<sub>1</sub> phenotypes were scored for seedlings sown on MS-plates and transferred to soil, based on flowering time and morphology.

<sup>3)</sup> F<sub>2</sub> phenotypes were scored for seedlings stratified for seven days and sown directly on soil. wt, wild type.

**Supplemental Table 2: Multiple *era1* alleles suppress *snc1*.**

| cross <sup>1)</sup>         | F <sub>1</sub><br>morphology <sup>2)</sup> | F <sub>2</sub><br>phenotypic segregation <sup>3)</sup> |         |                   |                   | hypothesis <sup>4)</sup> | $\chi^2$ | P    |
|-----------------------------|--------------------------------------------|--------------------------------------------------------|---------|-------------------|-------------------|--------------------------|----------|------|
|                             |                                            | total                                                  | wt-like | <i>snc1</i> -like | <i>era1</i> -like |                          |          |      |
| <i>snc1</i> X <i>era1-4</i> | wt-like                                    | 142                                                    | 80      | 28                | 34                | 9 : 3 : 4                | 0.1346   | 0.93 |
| <i>era1-5</i> X <i>snc1</i> | wt-like                                    | 104                                                    | 61      | 20                | 23                | 9 : 3 : 4                | 0.4658   | 0.79 |
| <i>snc1</i> X <i>era1-6</i> | wt-like                                    | 168                                                    | 92      | 35                | 41                | 9 : 3 : 4                | 0.4788   | 0.79 |
| <i>era1-8</i> X <i>snc1</i> | wt-like                                    | 327                                                    | 175     | 66                | 86                | 9 : 3 : 4                | 1.0136   | 0.60 |
| <i>era1-2</i> X <i>snc1</i> | wt-like                                    | 206                                                    | 118     | 41                | 47                | 9 : 3 : 4                | 0.5782   | 0.75 |

<sup>1)</sup> The crosses are indicated with the female parent first, the male parent second. *era1-4,5,6* are in Ler ecotype, *era1-2,8* are in Col ecotype.

<sup>2)</sup> F<sub>1</sub> phenotypes were scored for seedlings sown on MS-plates and transferred to soil, based on flowering time and morphology. wt, wild type.

<sup>3)</sup> F<sub>2</sub> phenotypes were scored for seedlings stratified for seven days and sown directly on soil.

<sup>4)</sup> The hypothesis for suppression of *snc1* in the F<sub>2</sub> is 9 wild type : 3 *snc1*-like : 4 *era1*-like.

**Supplemental Table 3: Putative ERA1-targets tested in this study.**

| Gene ID   | Putative function/homology                                  | CAAX <sup>1)</sup> | T-DNA lines tested <sup>2)</sup> | location of T-DNA insert <sup>3)</sup> |
|-----------|-------------------------------------------------------------|--------------------|----------------------------------|----------------------------------------|
| At1g18760 | Zinc finger (C3HC4-type RING finger) family protein         | CEDQ               | SALK_109030                      | 300-UTR5                               |
| At1g22790 | Expressed protein                                           | CVIM               | SALK_141943                      | 300-UTR5                               |
| At1g23000 | Heavy-metal-associated domain-containing protein            | CNIM               | SALK_114825                      | Exon                                   |
| At1g27850 | Similar to En/Spm-like transposon protein                   | CSIM               | SALK_005882                      | 300-UTR3                               |
| At1g28550 | Putative Ras-related GTP-binding protein                    | CCSA               | SAIL_218_C11                     | Exon                                   |
| At1g33480 | Zinc finger (C3HC4-type RING finger) family protein         | CRMQ               | SALK_108072                      | 300-UTR3                               |
| At1g49420 | Heavy-metal-associated domain-containing protein            | CSIM               | SALK_042250                      | Intron                                 |
| At1g51580 | Protein with KH domain/RNA binding protein                  | CGQS               | SAIL_1285_H03                    | Exon                                   |
| At1g67830 | alpha-fucosidase 1                                          | CKRQ               | SALK_140323                      | 300-UTR5                               |
| At1g74530 | EscC ( <i>E. coli</i> ) Type III secretion system component | CAKS               | SALK_110280                      | Intron                                 |
| At2g47950 | Hypothetical endomembrane protein                           | CLAS               | SALK_142871                      | Exon                                   |
| At3g04900 | Heavy-metal-associated domain-containing protein            | CSIM               | SALK_037340                      | 300-UTR5                               |
| At3g06300 | Prolyl-4 hydroxylase                                        | CKAC               | SALK_034891                      | 300-UTR3                               |
| At3g07600 | Heavy-metal-associated domain-containing protein            | CRIM               | SAIL_118_F05                     | Intron                                 |
| At3g13140 | Hydroxyproline-rich glycoprotein family protein             | CVIM               | SALK_001636                      | 300-UTR5                               |
| At3g21490 | Copper-binding family protein                               | CSIS               | SALK_101142                      | Intron                                 |
| At3g26380 | Glycosyl hydrolase family protein 27                        | CSNA               | SALK_016141, SALK_117663         | 300-UTR5                               |
| At3g26980 | Ubiquitin domain containing protein                         | CTIM               | SALK_045794                      | Promoter                               |
| At3g44630 | Disease resistance protein RPP1-WsB-like                    | CVSS               | SALK_144159                      | Exon                                   |
| At3g55260 | Glycosyl hydrolase family protein 20                        | CYAQ               | SALK_026094                      | Exon                                   |

Homozygous T-DNA insertion lines were tested for disease phenotypes after inoculation with *H. parasitica* and/or *P.s.m.* ES4326 (see Methods). Among all, none showed significant difference in resistance/susceptibility compared to simultaneously inoculated wild type plants.

continued on next page.

| Gene ID   | Putative function/homology                        | CAAX <sup>1)</sup> | T-DNA lines tested <sup>2)</sup> | Location of T-DNA insert <sup>3)</sup> |
|-----------|---------------------------------------------------|--------------------|----------------------------------|----------------------------------------|
| At4g32780 | Expressed protein                                 | CFLA               | SALK_011990                      | 300-UTR5                               |
| At5g03380 | Heavy-metal-associated domain-containing protein  | CSVM               | SALK_111020                      | Exon                                   |
| At5g08310 | Pentatricopeptide (PPR) repeat-containing protein | CFCS               | SALK_110420                      | Exon                                   |
| At5g17450 | Heavy-metal-associated domain-containing protein  | CSIM               | SALK_092415                      | Intron                                 |
| At5g33335 | Defensin-like family protein                      | CYKS               | SAIL_667_C08                     | Exon                                   |
| At5g42440 | Protein kinase                                    | CRFM               | SALK_134111                      | Exon                                   |
| At5g44880 | Hypothetical protein                              | CRRC               | SALK_122906                      | Exon                                   |
| At5g52740 | Heavy-metal-associated domain-containing protein  | CVTS               | SALK_082835, SALK_012334         | 300-UTR3, 300-UTR5                     |
| At5g63530 | Copper chaperone (CCH)-related                    | CTVM               | SALK_082835                      | 300-UTR3                               |
| At5g66110 | Heavy-metal-associated domain-containing protein  | CTIM               | SALK_051332                      | 300-UTR5                               |

**Supplemental Table 3 continued.**

<sup>1)</sup> CAAX-box denoting the farnesyltransferase recognition consensus at the C-terminus of putative targets.

<sup>2)</sup> T-DNA lines were obtained from ABRC and tested for homozygosity by PCR using a combination of T-DNA and gene specific primers.

<sup>3)</sup> Location of T-DNA insert. Over 50% of tested Salk-lines carry the T-DNA inside the gene (37.5% in exon, 15.625% in intron), while the remainder remaining lines have the T-DNA in the promoter (3.125%) or untranslated regions (28.125% 5'UTR, 15.625% 3'UTR)
